# Supplementary material
Source: publisher site journal article supplement (https://e-cmh.org/upload/media/cmh-2024-0042-Supplementary-Fig-2.pdf)
Supplement: Supplementary file 1 [file cmh-2024-0042-Supplementary-Fig-2.pdf]

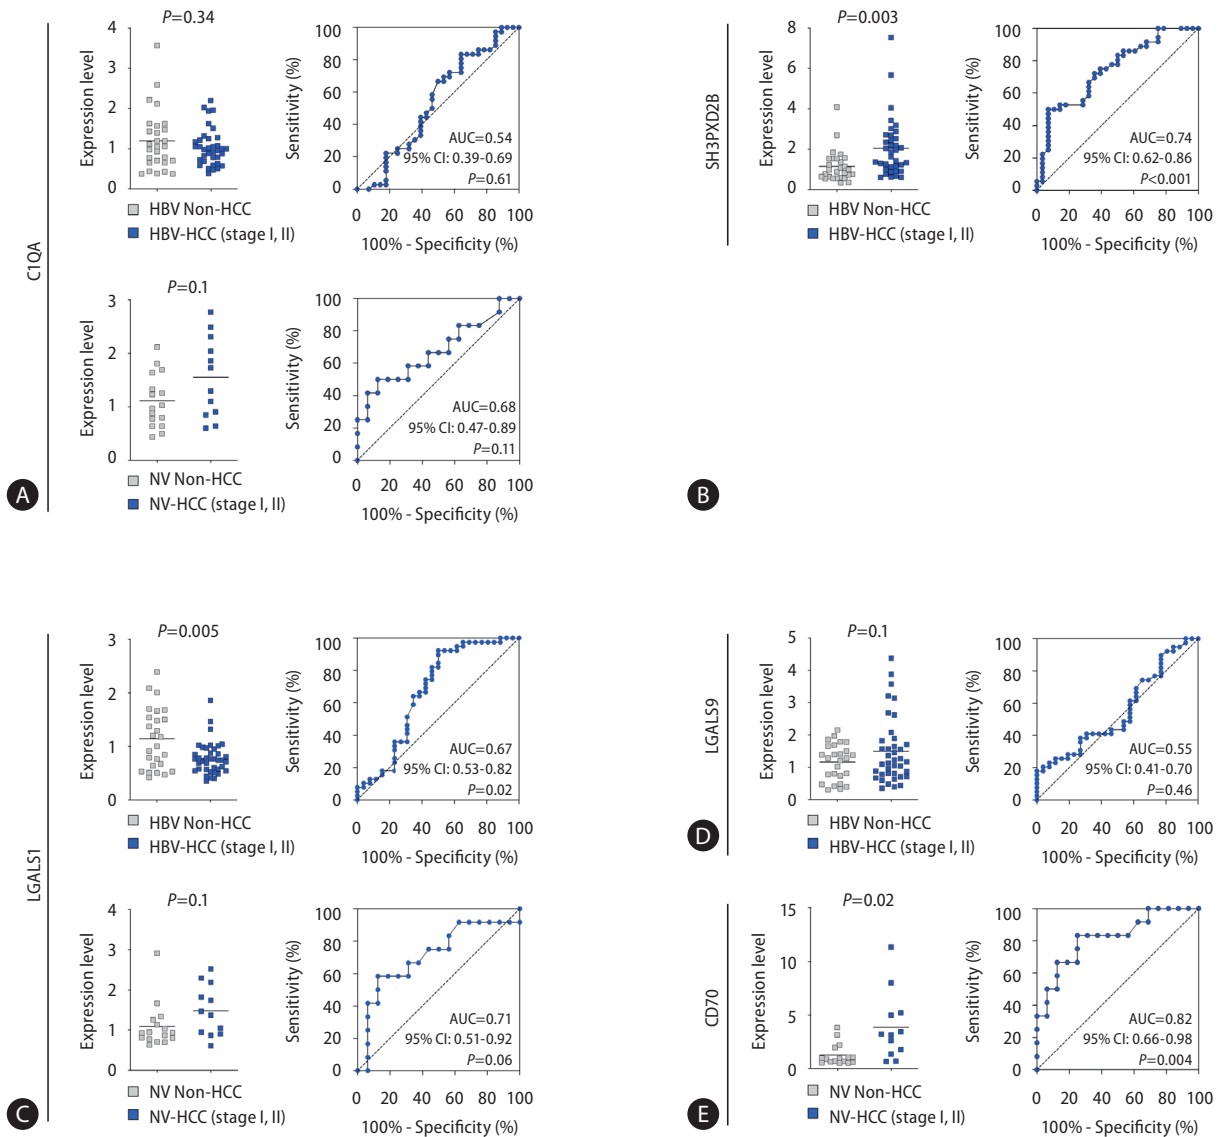

**Supplementary Figure 2.** qPCR-AUC analysis of the identified DEGs for detection of early-stage HCC. (A, B) qRT-PCR and AUC results for the buffy coat DEGs. (A) C1QA results for HBV-HCC and NV-HCC patients. (B) SH3PXD2B results for HBV-HCC. (C–E) qRT-PCR and AUC results of DEGs from multiomics profiling. (C) LGALS1 results for HBV-HCC and NV-HCC patients. (D) LGALS9 results for HBV-HCC. (E) CD70 results for NV-HCC. DEG, differentially expressed gene; HCC, hepatocellular carcinoma; HBV, hepatitis B virus; NV, nonviral.
